# Supplementary material for: Assessment of erectile dysfunction prevalence and associated factors in hypertensive men
Source: PeerJ. 2024 Nov 27;12:e18596. doi: 10.7717/peerj.18596 (PMC11608024; doi:10.7717/peerj.18596)
Supplement: Data S1 [file peerj-12-18596-s001.xlsx]

## Sheet: Sayfa1
Patient number	Willingness to participate in the study (Yes 1, No 2)	Age	Duration of hypertension	Marital status (Married 1, Single 2)	Educational level (Literate 1, Primary school graduate 2, High school graduate 3, University graduate 4)	Medicines used ( ACE Inhibitors (ACEI), Angiotensin Receptor Blockers (ATRB), Beta Blockers (BB), Diuretics, Calcium Channel Blockers (CCB))	smoking status (Yes 1, No 2)	Duration of smoking	alcohol use status (Yes 1, No 2)	Scale question 1	Scale question 2	Scale question 3	Scale question 4	Scale question 5
1	1	55	10	1	4	BB	1	20	2	2	3	2	3	3
2	1	57	10	1	2	BB	2		2	3	3	3	4	4
3	1	65	10	1	2	ACEI	1	25	2	4	4	4	4	4
4	1	65	5	1	4	BB	1	30	2	3	3	3	3	3
5	1	55	5	1	3	ACEI	2		2	4	4	4	4	4
6	1	64	3	1	3	BB	2		2	3	2	3	3	3
7	1	63	10	1	3	CCB	2		1	4	3	4	4	4
8	1	57	12	1	2	ACEI	2		2	2	3	3	3	3
9	1	60	5	1	3	ACEI	2		2	4	4	5	5	5
10	1	67	8	1	2	CCB	2		2	4	4	4	4	4
11	1	61	9	1	2	ANJİOTENSİN RESEPTÖR BLOKERLER	1	30	1	4	4	4	4	4
12	1	55	4	1	3	ATRB	2		1	4	4	4	4	4
13	1	50	8	1	2	ATRB	2		2	4	5	5	4	5
14	1	60	9	1	3	ATRB	1	30	1	4	4	4	4	4
15	1	60	5	1	2	BB	2		2	3	3	4	3	3
16	1	64	5	1	3	BB	2		2	3	3	3	3	2
17	1	50	6	1	2	BB	2		1	2	3	2	3	3
18	1	60	10	1	3	Diuretics	2		2	4	4	4	5	4
19	1	75	11	1	2	Diuretics	1	40	2	3	3	3	3	2
20	1	75	12	1	3	ACEI	2		2	3	3	3	2	2
21	1	68	18	1	2	ACEI	2		2	4	4	4	3	4
22	1	64	5	1	2	ATRB	2		2	4	5	5	5	5
23	1	60	8	1	2	BB	2		2	4	3	3	3	4
24	1	76	18	1	2	CCB	2		2	3	3	3	4	3
25	1	65	10	1	3	CCB	2		1	4	4	5	5	5
26	1	65	15	1	3	ACEI	2		2	4	4	4	4	5
27	1	70	10	2	3	ACEI	2		1	4	4	4	4	4
28	1	70	19	1	2	CCB	2		2	4	4	4	4	4
29	1	55	5	1	1	ATRB	2		2	5	5	5	5	5
30	1	65	9	1	1	ATRB	2		2	5	4	4	4	5
31	1	50	3	1	1	BB	2		2	4	3	3	3	4
32	1	60	10	1	1	BB	1	20	2	3	3	3	3	2
33	1	50	6	1	2	BB	1	14	2	2	2	3	3	3
34	1	65	6	1	3	ATRB	2		1	4	4	4	4	4
35	1	70	5	1	3	ATRB	1	25	2	3	2	2	3	3
36	1	50	8	1	2	Diuretics	2		2	5	4	4	5	5
37	1	65	12	1	2	Diuretics	2		2	5	5	5	5	5
38	1	60	5	1	2	BB	1	14	2	3	3	3	3	2
39	1	60	8	1	2	BB	2		2	3	3	3	3	3
40	1	63	9	1	2	BB	2		2	4	4	4	4	4
41	1	60	10	1	2	Diuretics	2		2	4	4	4	4	4
42	1	58	7	1	3	Diuretics	2		1	4	4	4	4	4
43	1	60	11	1	2	ATRB	2		2	4	5	5	5	5
44	1	69	11	2	2	ATRB	2		2	5	5	5	5	5
45	1	68	5	1	2	Diuretics	2		2	5	5	4	4	4
46	1	57	10	1	3	BB	2		1	4	4	5	5	5
47	1	63	6	2	3	Diuretics	2		2	4	4	4	5	5
48	1	57	8	1	2	BB	2		2	4	4	4	4	4
49	1	54	7	2	2	BB	2		2	4	4	4	5	5
50	1	56	8	1	3	ATRB	2		1	4	4	4	4	4
51	1	55	5	1	3	BB	2		1	3	4	3	3	3
52	1	60	11	2	3	Diuretics	2		1	4	4	5	4	4
53	1	61	5	1	2	Diuretics	1	18	1	3	2	2	2	2
54	1	63	8	1	3	BB	1	15	2	4	3	3	3	3
55	1	59	10	1	4	Diuretics	2		2	4	4	4	4	4
56	1	54	2	1	3	Diuretics	2		2	4	4	5	5	5
57	1	55	3	1	2	BB	2		2	4	3	3	3	3
58	1	60	12	1	2	ACEI	2		2	4	4	4	5	5
59	1	65	12	1	2	ATRB	2		2	4	4	4	4	4
60	1	78	10	1	2	BB	2		2	3	2	2	2	2
61	1	60	8	1	2	ATRB	2		2	4	4	4	4	5
62	1	59	8	1	3	Diuretics	2		2	4	4	5	5	5
63	1	55	4	1	3	BB	2		2	4	4	4	4	4
64	1	65	2	1	2	ACEI	2		1	4	5	5	4	4
65	1	58	3	1	3	CCB	2		1	5	5	5	5	5
66	1	57	5	1	2	CCB	2		2	5	5	5	5	5
67	1	67	8	1	3	ACEI	2		1	4	4	4	4	4
68	1	65	12	1	2	Diuretics	2		2	4	4	4	4	4
69	1	62	10	1	2	BB	2		2	3	3	4	3	3
70	1	65	7	1	3	BB	1	25	2	3	3	3	2	3
71	1	60	9	1	2	ATRB	2		2	4	4	4	4	4
72	1	66	12	1	3	ATRB	2		2	4	4	4	4	4
73	1	65	6	1	1	ATRB	2		2	4	4	4	4	4
74	1	45	6	1	3	BB	2		2	4	4	4	4	4
75	1	60	10	1	3	CCB	2		2	4	5	5	5	5
76	1	76	7	1	1	BB	2		2	2	2	3	3	2
77	1	65	10	1	3	ATRB	2		2	4	4	4	4	4
78	1	70	2	1	2	ACEI	2		2	3	3	3	3	3
79	1	53	3	1	2	CCB	2		2	4	4	4	5	4
80	1	60	5	1	3	ACEI	2		1	4	5	5	5	5
81	1	66	9	1	2	ACEI	2		2	4	4	4	4	4
82	1	65	2	1	2	CCB	2		2	5	5	5	5	5
83	1	62	5	1	3	CCB	2		2	4	4	4	4	4
84	1	60	5	1	3	ATRB	2		2	4	4	4	4	4
85	1	65	8	1	3	ACEI	2		2	4	4	5	5	5
86	1	56	8	1	3	ACEI	2		2	5	5	5	5	5
87	1	65	6	1	2	ACEI	2		2	4	4	4	4	4
88	1	50	1	1	2	Diuretics	2		2	4	4	4	4	4
89	1	58	5	1	2	CCB	2		2	4	4	4	4	4
90	1	68	6	1	2	CCB	2		2	4	4	4	4	4
91	1	59	5	1	3	BB	1	25	2	3	3	2	3	2
92	1	67	8	1	2	ATRB	1	25	2	3	3	3	3	2
93	1	61	6	1	3	ATRB	2		1	4	4	4	4	4
94	1	60	10	1	3	ATRB	2		1	4	4	4	4	4
95	1	65	12	1	3	CCB	2		2	4	4	4	4	4
96	1	67	9	1	2	CCB	2		2	3	3	3	3	3
97	1	65	4	1	2	ATRB	1	30	2	3	3	3	3	3
98	1	55	5	1	3	BB	2		2	3	3	3	3	3
99	1	65	8	1	3	BB	2		2	3	2	3	3	2
100	1	65	14	1	2	ATRB	2		2	4	4	4	5	5
101	1	66	16	1	2	ATRB	2		2	3	3	3	3	3
102	1	60	13	1	4	ACEI	2		2	4	4	4	4	4
103	1	76	6	1	2	ACEI	1	30	2	3	3	3	3	3
104	1	77	5	2	2	ACEI	1	20	2	3	3	2	2	2
105	1	65	8	1	2	ACEI	2		2	4	4	4	4	4
106	1	61	3	1	2	ATRB	2		2	4	4	4	4	4
107	1	63	9	1	3	ATRB	2		2	4	3	4	4	4
108	1	79	23	1	3	ACEI	2		2	3	3	3	3	3
109	1	65	10	1	2	CCB	2		2	4	4	4	4	4
110	1	65	14	1	2	ATRB	2		2	4	4	4	4	4
111	1	65	5	1	2	CCB	2		2	4	4	4	4	4
112	1	55	10	1	3	BB	2		2	3	3	3	3	3
113	1	56	10	1	3	BB	2		2	3	3	3	3	3
114	1	78	13	1	2	ACEI	2		2	3	3	3	2	2
115	1	70	20	1	2	ACEI	1	20	2	3	3	2	2	2
116	1	65	16	1	3	Diuretics	2		2	3	4	4	4	4
117	1	77	17	1	1	Diuretics	2		2	3	3	3	3	3
118	1	76	10	1	1	ACEI	2		2	3	3	3	3	3
119	1	90	20	1	1	ACEI	2		2	3	2	2	2	2
120	1	44	3	1	3	ATRB	2		2	5	5	5	5	5
121	1	58	4	1	3	ACEI	2		2	5	5	5	5	5
122	1	61	7	1	3	ATRB	2		2	5	5	5	5	5
123	1	65	5	1	2	ATRB	2		2	5	5	5	5	5
124	1	60	5	1	3	BB	2		2	3	3	4	3	3
125	1	64	10	1	2	ATRB	2		2	4	4	4	4	4
126	1	66	8	1	2	ATRB	2		2	4	4	4	4	4
127	1	50	7	1	2	BB	2		2	4	4	4	4	4
128	1	64	5	1	2	BB	2		2	3	3	3	3	3
129	1	67	8	1	3	ACEI	2		2	4	4	4	4	4
130	1	55	5	1	3	ACEI	2		2	4	4	4	4	4
131	1	60	7	1	2	ACEI	2		2	4	4	4	4	4
132	1	80	14	1	1	ACEI	2		2	3	2	2	2	2
133	1	75	9	1	2	BB	2		2	2	2	2	2	2
134	1	65	9	1	2	ATRB	2		2	3	4	4	4	4
135	1	65	8	1	2	ATRB	2		2	4	4	4	4	4
136	1	70	8	1	2	ATRB	2		2	4	4	4	4	4
137	1	59	9	1	3	Diuretics	1	20	2	3	3	3	3	3
138	1	60	4	1	3	Diuretics	1	23	2	4	4	4	4	4
139	1	60	8	1	3	ACEI	2		2	4	4	4	4	4
140	1	61	6	1	2	BB	2		2	3	3	3	3	3
141	1	70	10	1	2	ACEI	2		2	4	4	4	4	4
142	1	70	10	1	2	ACEI	2		2	4	4	4	4	4
143	1	65	9	1	3	CCB	2		2	4	4	4	4	4
144	1	60	8	1	3	ACEI	2		2	4	4	4	4	4
145	1	60	10	1	3	ACEI	2		2	4	4	5	5	5
146	1	59	6	1	4	BB	2		2	3	3	3	3	3
147	1	59	9	1	3	BB	2		2	4	4	4	4	4
148	1	60	12	1	4	BB	2		2	4	3	3	3	3
149	1	76	16	1	3	ATRB	2		2	4	4	4	4	4
150	1	75	15	1	2	ATRB	2		2	3	2	3	3	2
151	1	67	13	1	2	ATRB	2		2	4	4	3	4	3
152	1	55	5	1	2	BB	2		2	4	4	4	4	4
153	1	64	10	1	3	ATRB	2		2	4	4	4	4	4
154	1	76	16	1	2	ACEI	2		2	3	3	3	3	3
155	1	71	12	1	2	ACEI	2		2	4	4	3	3	2
156	1	65	10	1	3	ATRB	2		2	4	4	4	4	4
157	1	69	10	1	2	ATRB	2		2	3	3	3	3	3
158	1	78	13	1	2	ATRB	2		2	3	3	3	3	3
159	1	60	5	1	2	Diuretics	2		2	4	4	4	4	4
160	1	55	6	1	3	BB	2		2	3	3	4	3	3
161	1	58	5	1	3	Diuretics	2		2	4	5	5	5	5
162	1	61	6	1	2	Diuretics	2		2	4	4	4	4	4
163	1	77	10	1	3	ACEI	2		2	4	3	3	3	3
164	1	72	12	1	3	ACEI	2		2	4	4	4	4	4
165	1	65	6	1	2	CCB	2		2	4	5	5	5	5
166	1	65	5	1	2	CCB	2		2	4	4	4	4	4
167	1	63	7	1	3	ACEI	2		2	4	5	5	5	5
168	1	63	5	1	2	ATRB	2		2	4	4	4	4	4
169	1	60	8	1	2	CCB	2		2	4	4	4	4	4
170	1	66	10	1	2	ATRB	2		2	4	5	5	5	5
171	1	67	10	1	3	ACEI	2		1	4	4	4	4	4
172	1	73	6	1	3	ACEI	2		2	4	5	5	5	5
173	1	65	7	1	3	BB	2		2	3	4	3	4	3
174	1	76	12	1	1	ATRB	1	18	2	3	3	4	3	3
175	1	86	20	1	1	ACEI	2		2	3	2	2	2	2
176	1	70	9	1	3	ACEI	2		2	3	3	3	3	3
177	1	58	3	1	3	ACEI	2		2	4	4	4	4	4
178	1	50	2	1	4	BB	2		2	4	3	4	3	4
179	1	46	2	1	3	CCB	1	10	2	4	4	4	4	4
180	1	70	6	1	2	ACEI	1	12	2	3	3	3	3	3
181	1	52	4	1	3	ACEI	1	18	2	3	3	3	3	3
182	1	56	5	1	3	ACEI	1	20	2	4	4	4	4	4
183	1	60	8	1	2	ATRB	1	25	2	4	3	4	4	3
184	1	65	5	1	3	ATRB	2		2	4	4	4	4	4
185	1	50	2	1	3	CCB	2		2	4	4	4	4	4
186	1	67	10	1	3	CCB	2		2	4	4	4	3	4
187	1	60	5	1	2	ATRB	2		2	4	4	4	4	4
188	1	57	5	1	3	CCB	2		2	4	4	4	4	4
189	1	58	3	1	3	BB	2		2	4	4	4	4	4
190	1	67	5	1	2	ACEI	2		2	4	3	4	4	4
191	1	60	5	1	2	Diuretics	2		2	4	4	4	4	4
192	1	65	10	1	3	Diuretics	2		2	4	4	4	4	4
193	1	78	11	1	3	Diuretics	2		2	3	4	3	3	4
194	1	73	12	1	2	ACEI	2		2	4	4	4	4	4
195	1	59	4	1	2	CCB	2		2	4	4	4	4	4
196	1	60	3	1	2	CCB	2		2	4	4	4	4	4
197	1	65	7	1	3	CCB	1	25	2	3	3	3	3	2
198	1	67	9	1	3	ACEI	2		2	3	3	3	3	3
199	1	50	2	1	3	BB	2		2	2	2	2	2	2
200	1	54	2	1	3	CCB	2		2	4	4	4	4	4
201	1	58	5	1	4	ACEI	2		2	4	5	5	5	5
202	1	70	9	1	2	ACEI	2		2	4	4	4	4	4
203	1	80	20	1	2	ACEI	2		2	2	2	2	2	2
204	1	76	12	1	2	ACEI	2		2	3	3	3	3	3
205	1	65	4	1	2	CCB	2		2	4	4	4	4	4
206	1	55	2	1	3	BB	2		2	3	3	3	3	3
207	1	50	2	1	3	BB	2		2	3	3	3	3	3
208	1	58	5	1	3	ACEI	2		2	4	5	5	5	5
209	1	53	3	1	3	ACEI	2		2	4	4	4	4	4
210	1	70	10	1	2	ACEI	2		2	4	4	4	4	4
211	1	75	12	1	2	CCB	2		2	4	4	4	4	4
212	1	67	3	1	2	Diuretics	2		2	4	5	4	5	5
213	1	68	7	1	3	Diuretics	1	35	2	3	3	2	3	2
214	1	71	5	1	2	ACEI	2		2	3	3	3	3	3
215	1	73	5	1	3	ACEI	2		2	4	5	4	5	5
216	1	75	8	1	3	ACEI	2		2	4	4	4	4	4
217	1	60	5	1	2	CCB	2		2	5	4	4	4	5
218	1	55	2	1	3	ATRB	2		2	4	4	4	4	4
219	1	59	4	1	3	ATRB	2		2	4	4	4	4	4
220	1	60	3	1	3	ATRB	2		2	4	4	4	4	4
221	1	65	3	1	3	CCB	2		2	5	4	4	4	4
222	1	65	5	1	2	CCB	2		2	4	4	4	4	4
223	1	54	2	1	3	BB	2		2	4	4	4	4	4
